# Supplementary material for: The early diagnosis and monitoring of squamous cell carcinoma via saliva metabolomics
Source: PubMed Central journal article supplement — Sci Rep. 2014 Oct 30;4:6802. doi: 10.1038/srep06802 (PMC4213796; doi:10.1038/srep06802), 2014-10-30

**The early diagnosis and monitoring of squamous cell carcinoma  
via saliva metabolomics**

Qihui Wang<sup>1</sup>, Pan Gao<sup>2</sup>, Xiaoyi Wang<sup>2</sup>, Yixiang Duan<sup>\*1</sup>

*<sup>1</sup>Research Center of Analytical Instrumentation, College of Life Science, Sichuan University, Chengdu 610064, P. R. China*

*<sup>2</sup>Department of Head and Neck Oncology, West China College of Stomatology, Sichuan University, Chengdu 610064, P. R. China*

**Supplemental Table 1.** Clinical characteristics of saliva samples used in this study

| Characteristics                | OSCC patients            | Healthy controls |
|--------------------------------|--------------------------|------------------|
| Number of subjects             | 30                       | 30               |
| Race                           | Chinese                  | Chinese          |
| Gender (Male/Female)           | 25/5                     | 25/5             |
| Age (mean, range)              | 55, 29-72                | 47, 25-69        |
| Clinical staging               |                          |                  |
| Early stage (I-II)             | 13 (I:4, II:9)           |                  |
| Advanced stage (III-IV)        | 17 (III:3, IV:14)        |                  |
| TNM staging <sup>a</sup>       |                          |                  |
| Tumor states (T)               | T1:7, T2:10, T3:1, T4:12 |                  |
| Regional lymph node status (N) | N0:18, N1:9, N2:3        |                  |
| Distant metastasis status (M)  | M0:30, M1:0              |                  |

<sup>a</sup>cTNM.

**Supplemental Figure 1.** Metabonomics research strategy with the integration of RPLC and HILIC for OSCC salivary biomarkers identification.

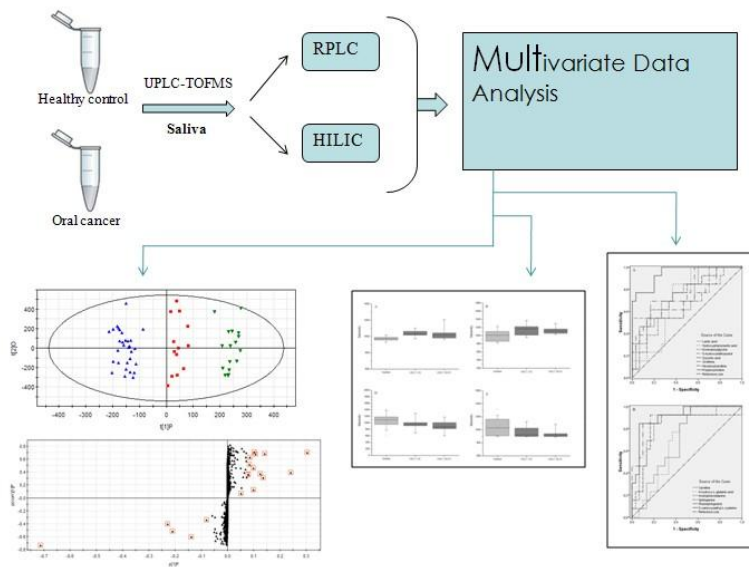

**Supplemental Figure 2.** The elemental composition analysis for the ion of  $m/z$  89.0226/2.59 min in HILIC with negative-ion mode.

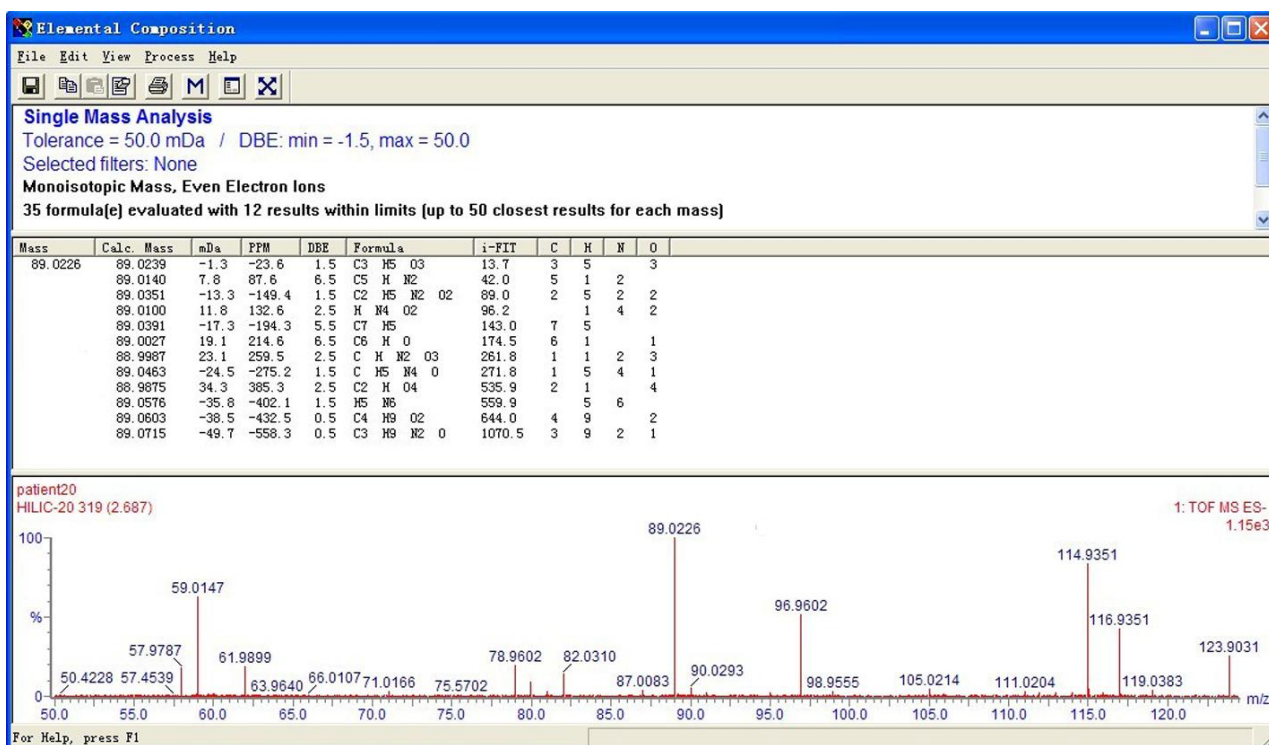

Supplemental Figure 3. Phenylalanine metabolism

PHENYLALANINE METABOLISM

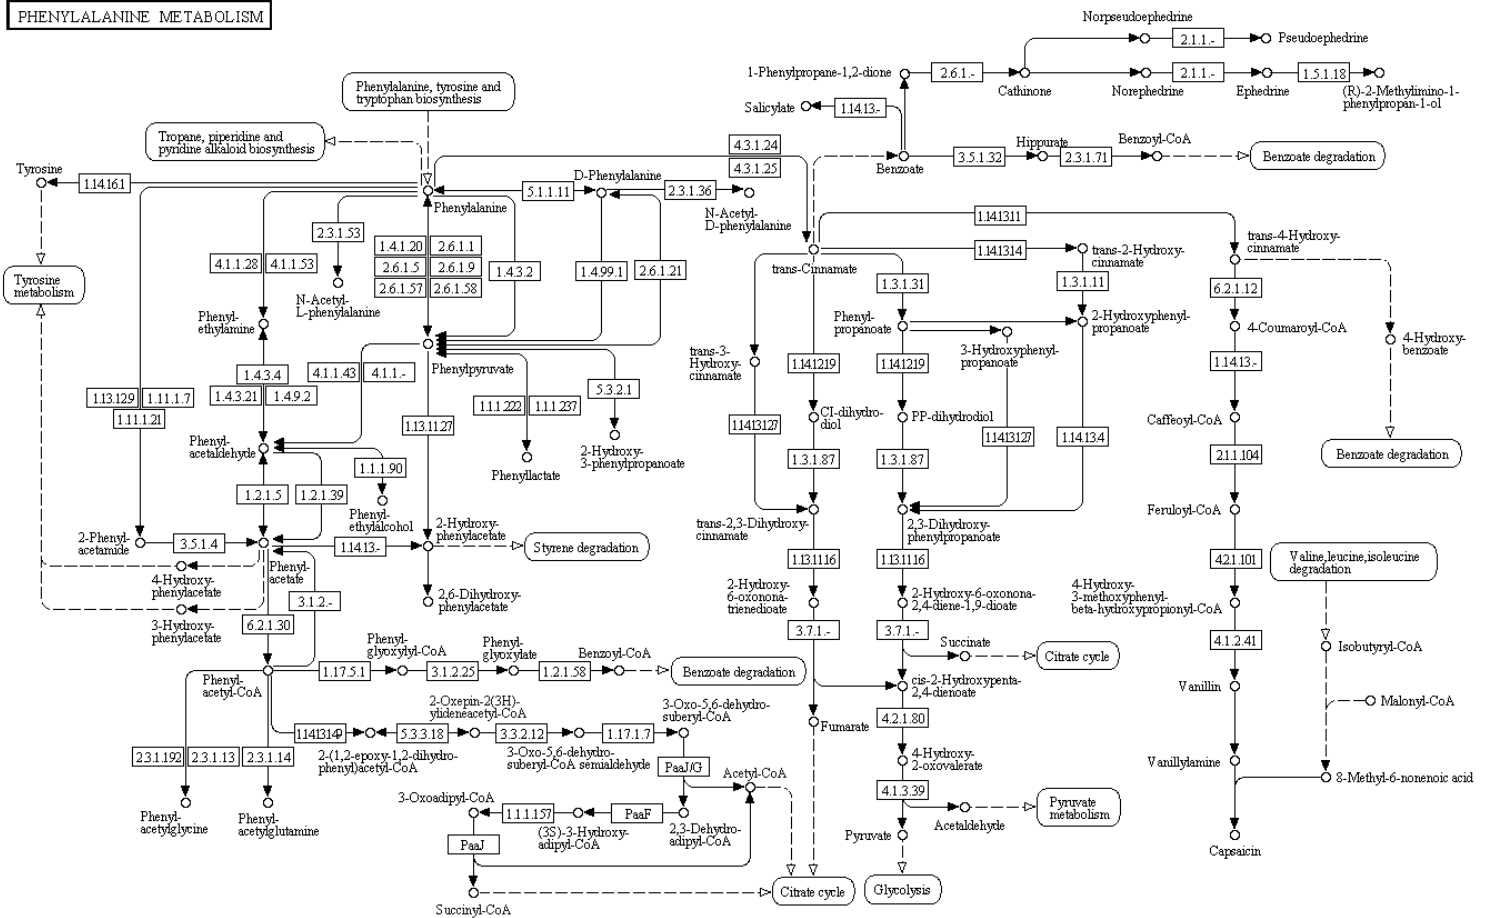

**Supplemental Figure 4. Sphingolipid metabolism**

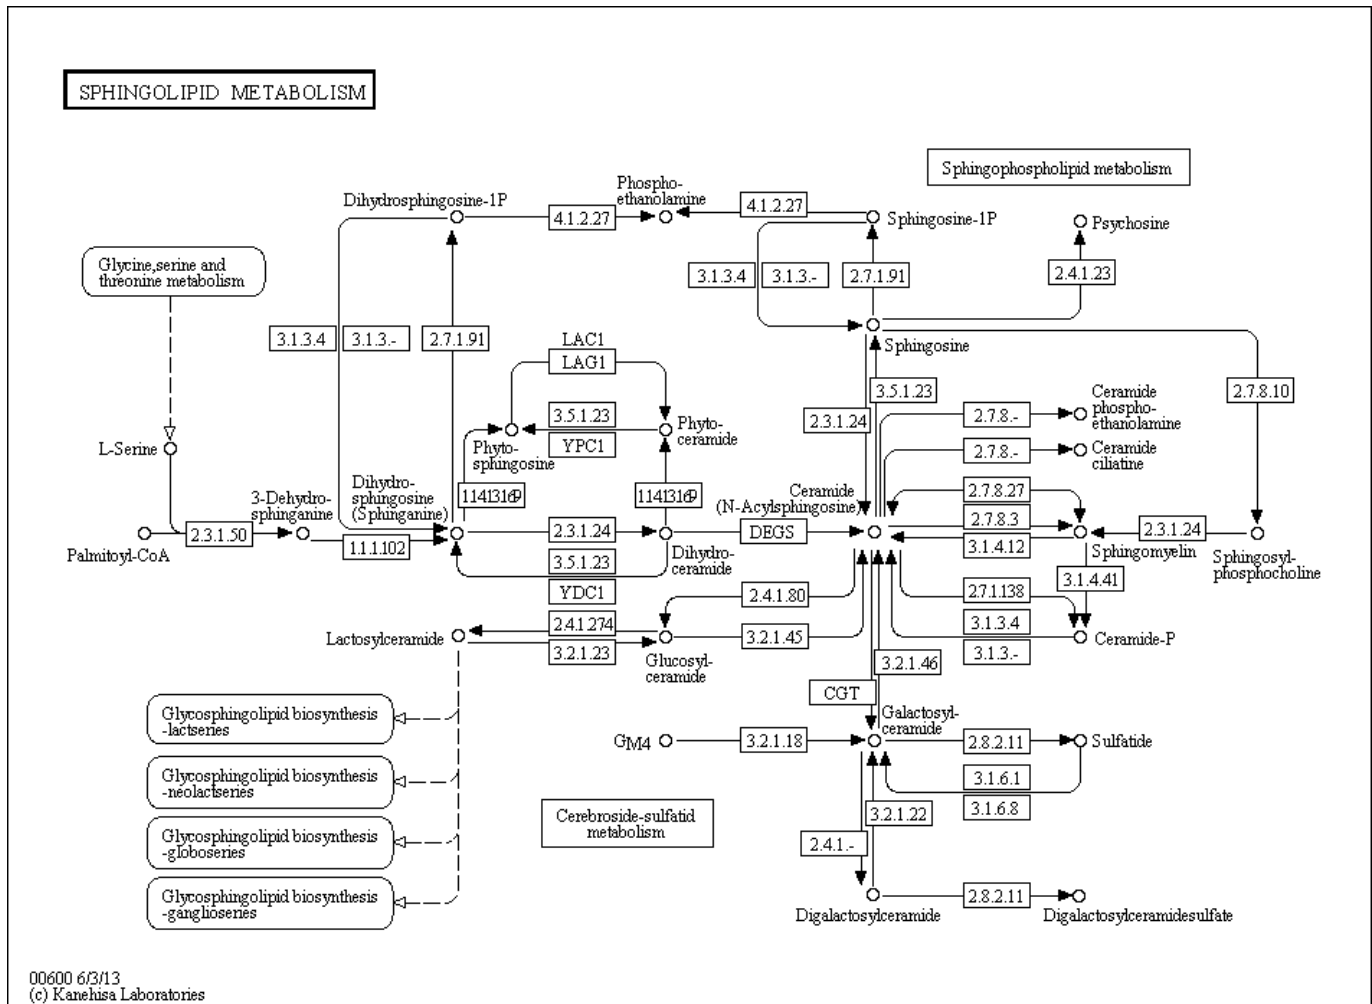

Supplement: srep06802-s1.pdf [file srep06802-s1.pdf]
